## Information about the journal

All communications should be addressed to the Editor,  
The Journal of Experimental Biology, Department of Zoology,  
Downing Street, Cambridge CB2 3EJ, England.

### Experiments on living animals

The Editorial Board will not allow the publication of papers describing experimental procedures which may reasonably be presumed to have inflicted unnecessary pain, discomfort, or disturbance of normal health on living animals. Manuscripts will only be accepted if:

- 1 it is clear that the advances made in physiological knowledge justified the procedures;
- 2 appropriate anaesthetic and surgical procedures were followed;
- 3 adequate steps were taken to ensure that animals did not suffer unnecessarily at any stage of the experiment.

Papers on vertebrates will be accepted only if the experiments comply with the legal requirements in the UK (see *Handbook for the Animal Licence Holder* – Institute of Biology; *Notes on the Law Relating to Experiments on Animals in Great Britain* – Research Defence Society; *UFAW Handbook on the Care and Management of Laboratory Animals*) or Federal Legislation and the National Institutes of Health Guidelines in the USA. Department of Health Education and Welfare Publication No. NIH 78-23 (1978).

### Subscriptions

*The Journal of Experimental Biology* (ISSN 0022-0949) is published as seven volumes a year in January, March, May, July, September, October and November. The subscription price of volumes 155–161 (1991) is USA and Canada US \$775.00, Japan £495.00, rest of the world £445.00 per annum, payable in advance; postage is included. There are reduced subscriptions for individual use (£65, \$90). Orders for 1991, which can be in £ Sterling/Dollars or Access/Visa credit cards, should be sent to Portland Press Ltd, PO Box 32, Commerce Way, Colchester CO2 8HP, UK or to your normal agent or bookseller. Copies of the journal for subscribers in the USA and Canada are sent by air to New Jersey to arrive with minimum delay. Second class postage paid at Rahway, NJ, and at additional mailing offices.

Postmaster, send address corrections to: The Journal of Experimental Biology, c/o Mercury Airfreight International Inc., 2323 Randolph Avenue, Avenel, New Jersey 07001, USA (US Mailing Agent).

**Claims** for missing parts can only be considered if made immediately upon receipt of the subsequent issue.

**Back volumes.** Please contact Portland Press Ltd (see above) for prices.

**Index.** An annual index will appear in the last volume each year.

### Copyright and reproduction

Authors may make copies of their own papers in this journal without seeking permission from The Company of Biologists Limited, *provided that such copies are for free distribution only: they must not be sold.*

Authors may re-use their own illustrations in other publications appearing under their own name, without seeking permission.

Specific permission will *not* be required for photocopying copyright material in the following circumstances.

- 1 For private study, provided the copying is done by the person requiring its use, or by an employee of the institution to which he/she belongs, without charge beyond the actual cost of copying.
- 2 For the production of multiple copies of such material, to be used for *bona fide* educational purposes, provided this is done by a member of the staff of the university, school or other comparable institution, for distribution without profit to student members of that institution provided the copy is made from the original journal.

For all other matters relating to the reproduction of copyright material written application must be made to Dr R. J. Skaer, Company Secretary, The Company of Biologists Limited, Department of Zoology, Downing Street, Cambridge CB2 3EJ, UK.
